# Supplementary material
Source: PubMed Central journal article supplement (PMC6451064)
Supplement: BPH-176-1090-s001.pdf [file BPH-176-1090-s001.pdf]

1 SUPPORTING INFORMATION

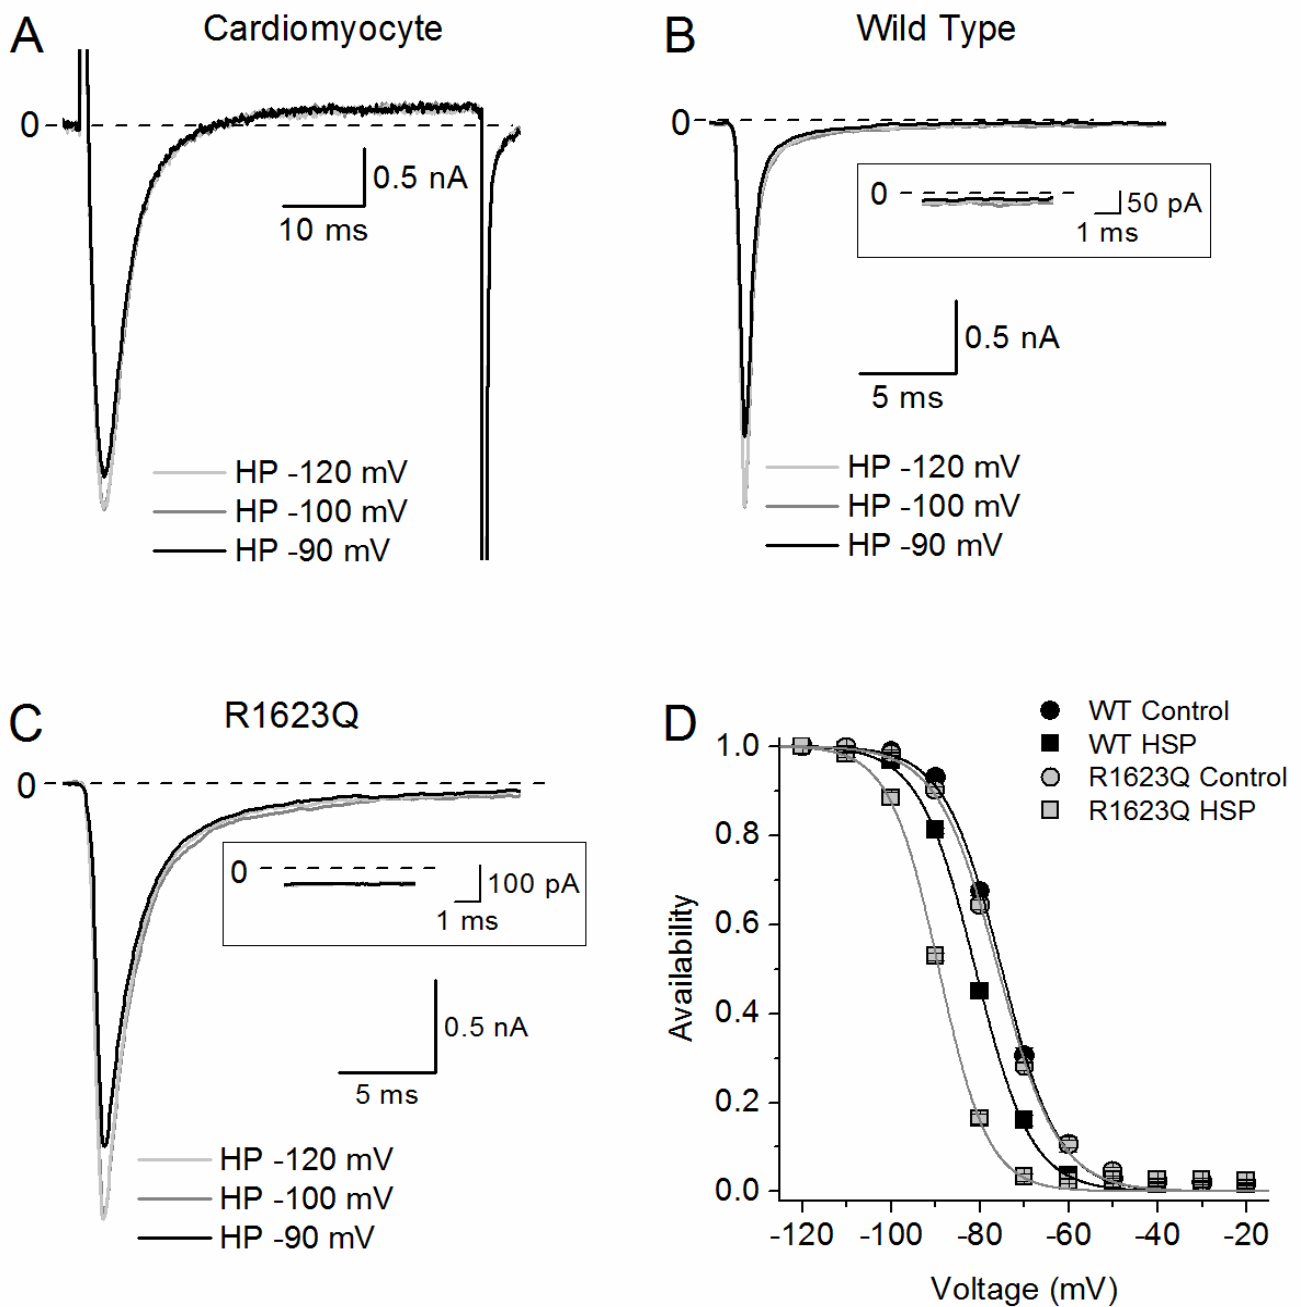

2

3 **Figure S1. - Peak  $I_{Na}$  is saturated at a holding potential of -100 mV.**

4 **A.-** Representative recordings of  $I_{Na}$  in a cardiomyocyte at HP of -120, -100 and -90 mV using a 10  
 5  $\text{mmol}\cdot\text{L}^{-1}$  extracellular  $\text{Na}^+$  solution and test pulses to -40 mV.  $I_{Na\text{-Peak}}$  was identical at HP of -120 and  
 6 -100 mV. A small decrease is only seen at HP = -90 mV.  $I_{Na\text{-Peak}}$  density was compared in 5  
 7 cardiomyocytes at HP of -120 and -100 mV and yielded values of  $-21.8 \pm 1.3 \text{ pA}\cdot\text{pF}^{-1}$  and  $-21.9 \pm 1.2$

8 pA·pF<sup>-1</sup>, respectively (not statistically significant; n = 5 cells isolated from 5 hearts; paired t-test). **B.-**  
9 Recordings obtained in a HEK293T cell expressing the human WT Nav1.5 channel. I<sub>Na</sub> was evoked at  
10 a test potential of -20 mV. For the sake of clarity only the first 25 ms of the current recordings are  
11 shown. The inset shows the last 5 ms (from 45 ms to 50 ms) of the current recording. I<sub>Na-Peak</sub> density  
12 was compared in 7 cells at HP of -120 and -100 mV and yielded values of -91 ± 12 pA·pF<sup>-1</sup> and -88 ±  
13 8 pA·pF<sup>-1</sup>, respectively (not statistically significant; n = 7; paired t-test). **C.-** Recordings obtained in a  
14 HEK293T cell expressing the human R1623Q Nav1.5 channel. I<sub>Na</sub> was evoked at a test potential of -  
15 20 mV. For the sake of clarity only the first 25 ms of the current recording are shown. The inset shows  
16 the last 5 ms (from 45 ms to 50 ms) of the current recording. I<sub>Na-Peak</sub> density was compared in 7 cells  
17 at HP of -120 and -100 mV and yielded values of -96 ± 13 pA·pF<sup>-1</sup> and -90 ± 10 pA·pF<sup>-1</sup>, respectively  
18 (not statistically significant; n = 7; paired t-test). As expected, since I<sub>Na-Peak</sub> amplitudes were not  
19 significantly different at the HP of -120 and -100 mV, availability curves obtained from HP -120 mV  
20 (**D**) were not significantly different to the ones obtained from a HP of -100 mV (see Figure 6C, D).  
21 The dots represent the mean ± s.e.m. (n = 13) of the availability curve (in HEK293T cells) for WT and  
22 R1623Q in control and in the presence of 100 μmol·L<sup>-1</sup> HSP. V<sub>inac</sub> and S<sub>inac</sub> obtained from a HP of -120  
23 mV were -74.4 ± 0.6 mV and 6.5 ± 0.3 mV and -76.2 ± 0.4 mV and 6.8 ± 0.3 mV in the WT and the  
24 R1623Q mutant channel, respectively (not significantly different to the ones obtained from a HP of -  
25 100 mV). HSP significantly shifted the availability curve compared to control in both the WT and  
26 R1623Q channels. V<sub>inac</sub> and S<sub>inac</sub> were -80.8 ± 0.8 mV and 6.3 ± 0.2 mV and -88.3 ± 0.6 mV and 5.5 ±  
27 0.3 mV in the WT and the R1623Q mutant channel, respectively (P < 0.05; paired t-test). The shifts  
28 induced by HSP on the WT and R1623Q availability curves were not significantly different to the ones  
29 obtained from a HP of -100 mV (see Figure 6C, D).

30

31

32

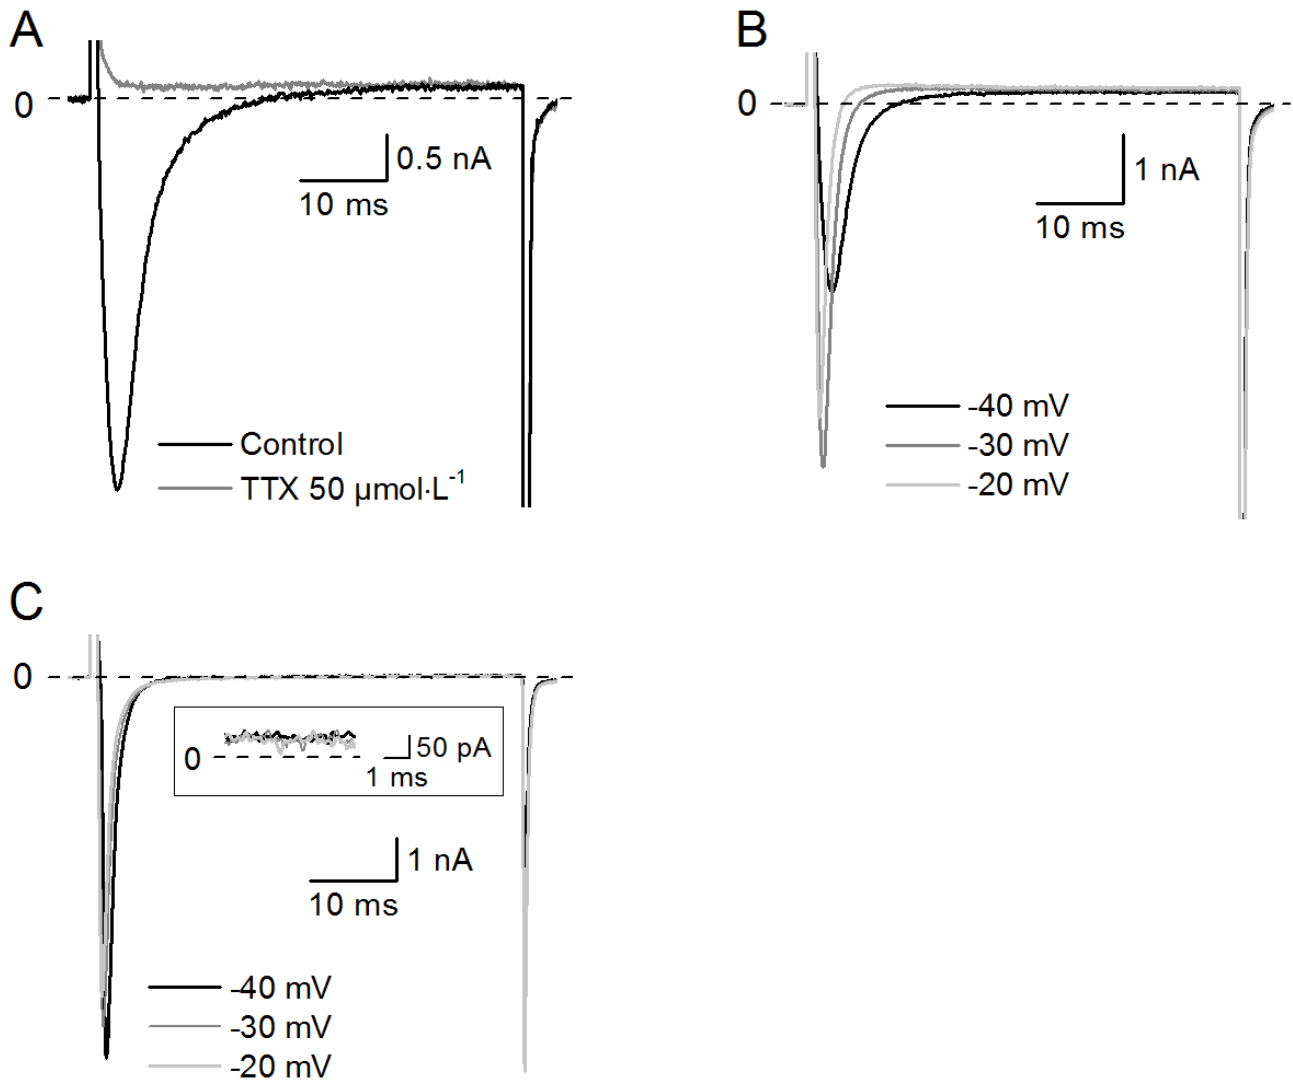

33

34 **Figure S2. - Absence of  $I_{Na-Late}$  in rat ventricular cardiomyocytes.**

35 **A.-**  $I_{Na}$  recorded at -40 mV in a cardiomyocyte clamped at a HP of -100 mV; extracellular  $Na^+$   
 36 concentration was 10 mmol·L<sup>-1</sup>. Recordings were obtained under control condition and in the presence  
 37 of tetrodotoxin (TTX, 50 μmol·L<sup>-1</sup>; n = 5). Note that  $I_{Na}$  was completely blocked by TTX and that the  
 38 current level at the end of the voltage-clamp pulse was the same in both conditions. This indicates that  
 39 there was no late steady-state inward current at the end of the pulse in control condition. **B.-**  $I_{Na}$   
 40 recorded at different test potentials from a HP of -100 mV. Extracellular  $Na^+$  was 10 mmol·L<sup>-1</sup>. Note  
 41 that not only at -40 mV but also at more depolarized test potentials (-30 and -20 mV), no  $I_{Na-Late}$  was  
 42 observed (n = 5). Instead, a small steady outward current was more evident at these potentials. **C.-** In

43 order to rule out any influence of the low extracellular  $\text{Na}^+$  concentration on the presence or not of  $I_{\text{Na-Late}}$ ,  
44 we performed  $I_{\text{Na}}$  recordings in rat ventricular cardiomyocytes at  $117 \text{ mmol}\cdot\text{L}^{-1}$  extracellular  $\text{Na}^+$   
45 concentration. Although there was no voltage control under this condition, no  $I_{\text{Na-Late}}$  could be recorded  
46 at test potentials between  $-40$  and  $-20 \text{ mV}$  ( $n = 5$ ). The inset shows the last  $5 \text{ ms}$  (from  $45 \text{ ms}$  to  $50 \text{ ms}$ )  
47 of the current recording. In cardiomyocytes, the steady outward current at the end of the voltage-clamp  
48 pulse is related to the electrogenic  $\text{Na}^+\text{-Ca}^{2+}\text{X}$  current, which at the  $\text{Na}^+$  and  $\text{Ca}^{2+}$  concentrations used  
49 for cardiomyocytes has a reversal potential around  $-60 \text{ mV}$ . Therefore, at more depolarized potentials  
50 the  $\text{Na}^+\text{-Ca}^{2+}$  exchanger exhibits a small outward current.

51  
52  
53  
54  
55  
56  
57  
58  
59  
60  
61  
62  
63  
64  
65  
66  
67  
68  
69  
70  
71

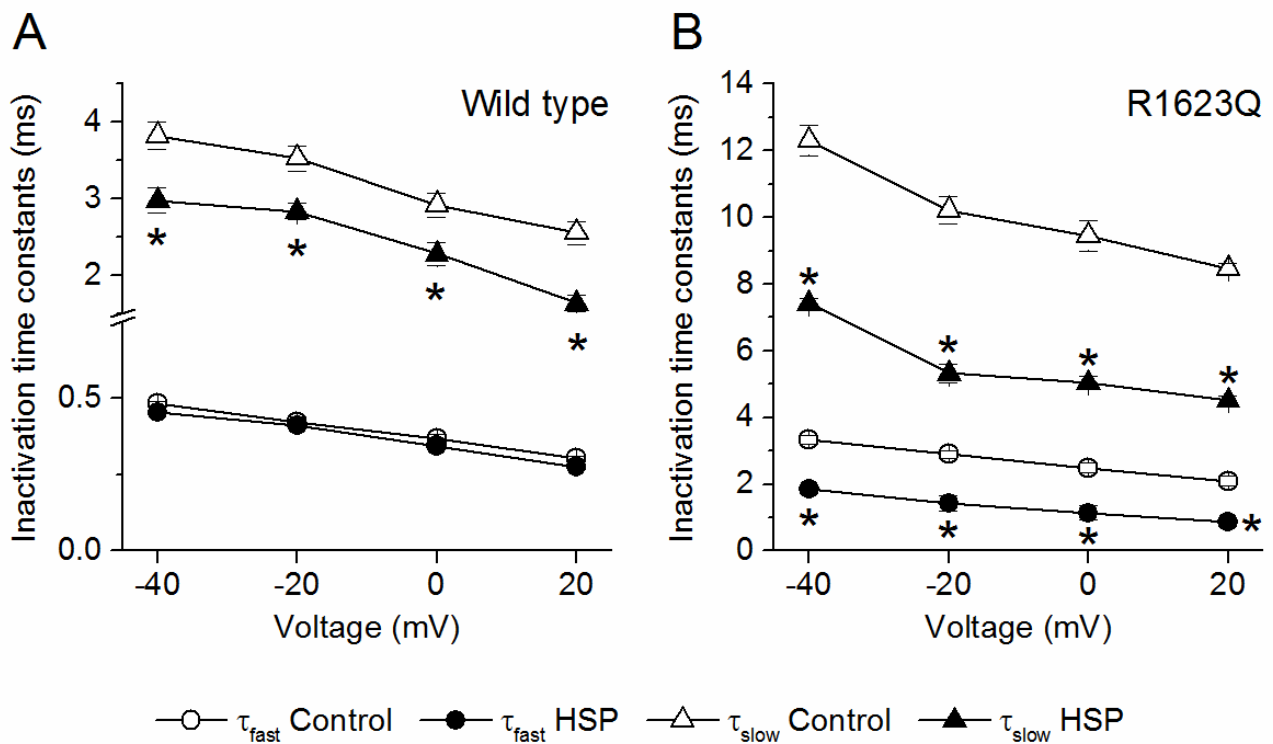

72

73 **Figure S3. - Voltage dependency of inactivation time constants of  $I_{Na}$ .**

74 Inactivation time constants  $\tau_{fast}$  and  $\tau_{slow}$  in control conditions and in the presence of HSP ( $100 \mu\text{mol}\cdot\text{L}^{-1}$ ) in HEK293T cells expressing WT (A) and R1623Q (B) channels. HSP significantly decreased  $\tau_{fast}$

75  $\tau_{fast}$  only in the R1623Q mutant but significantly decreased  $\tau_{slow}$  in both WT and mutant channels although

76 the decrease in  $\tau_{slow}$  was more marked in the mutant. \*  $P < 0.05$  with respect to control;  $n = 12$ ; one-

77 way ANOVA with Tukey's post hoc test. Note that the effects of HSP on inactivation time constants

78 were not voltage-dependent and the reduction by HSP was proportional at all voltages studied.

79

80

81

82

83

84

85

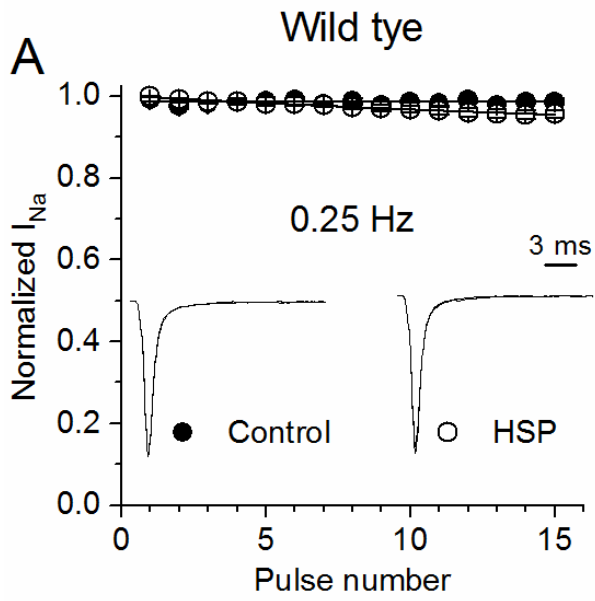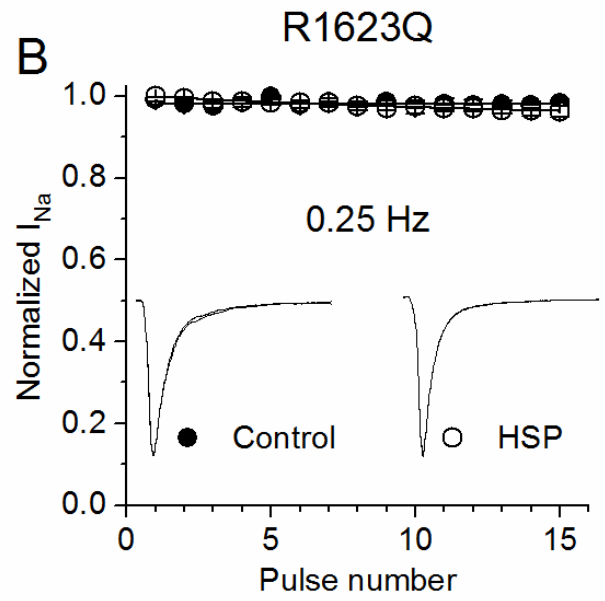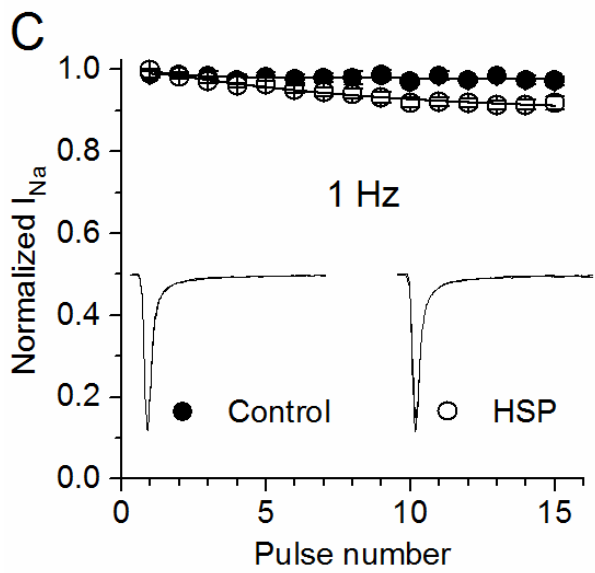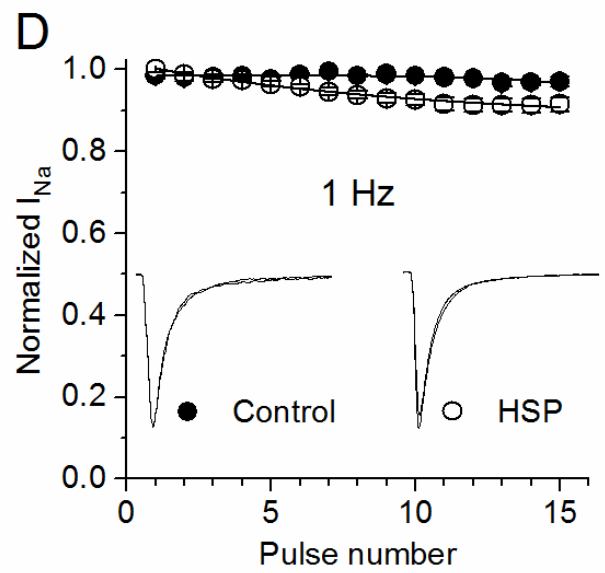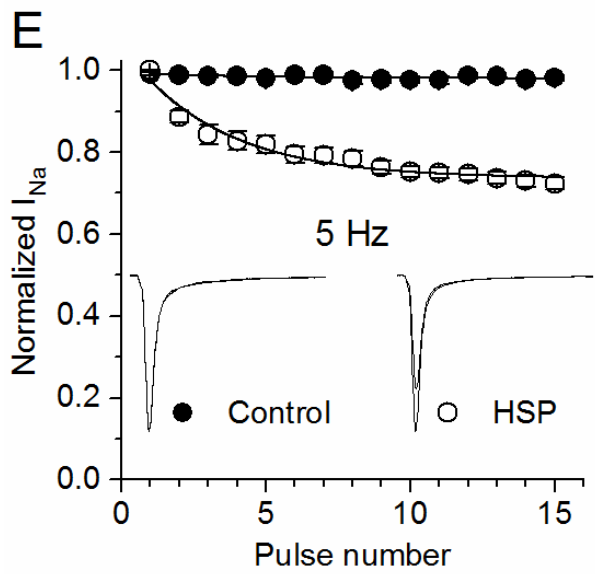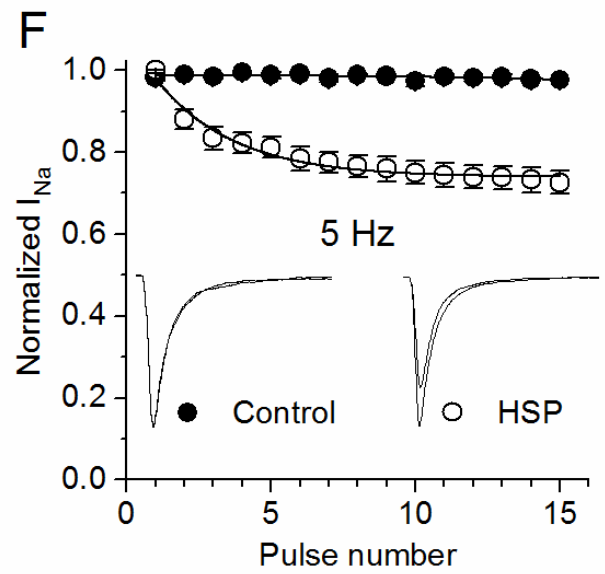

87 **Figure S4. - Tonic and use-dependent block of hesperetin on  $I_{Na}$  in WT and R1623Q mutant**  
88  **$hNav1.5$  channels.**

89 **A to F.-** Normalized peak  $I_{Na}$  at different frequencies of stimulation. The cells were clamped at -100  
90 mV and test pulses to -20 mV were applied at the control frequency (0.25 Hz). Then, stimulation was  
91 stopped for 1 min and HSP ( $100 \mu\text{mol}\cdot\text{L}^{-1}$ ) was perfused during and after this rest period. Subsequently,  
92 stimulation was resumed (still in the presence of HSP) at the frequencies shown (A and B: 0.25 Hz; C  
93 and D: 1 Hz; E and F: 5 Hz). A first pulse (tonic) block of  $I_{Na}$  by HSP (not shown) occurred when  
94 stimulation was resumed and was followed by a clear but small use-dependent block at 1 Hz. The tonic  
95 block amounted to  $94.8 \pm 1.8 \%$  and  $95.9 \pm 1.6 \%$  of total block for WT and R1623Q, respectively, at  
96 the lowest frequency (0.25 Hz panels A and B). At 1 Hz the tonic block was  $93.3 \pm 0.8 \%$  and  $90.7 \pm$   
97  $2.7 \%$  of total block for WT and R1623Q, respectively, due to the small use-dependent block ( $6.8 \pm$   
98  $0.7 \%$  for WT and  $9.8 \pm 2.9 \%$  for R1623Q; panels C and D). However, at 5 Hz a use-dependent block  
99 of HSP on WT and R1623Q  $hNav1.5$  channels becomes more evident. At this frequency, the tonic  
100 block of  $I_{Na}$  by HSP was reduced to  $72.4 \pm 5.3 \%$  and  $72.7 \pm 5.1 \%$  of total block for WT and R1623Q,  
101 respectively, while use-dependent block amounted to  $27.7 \pm 1.5 \%$  and  $27.4 \pm 2.9 \%$  of total block for  
102 WT and R1623Q, respectively (panels E and F).  $I_{Na}$  was normalized by dividing peak current at each  
103 pulse by the peak current amplitude at the first pulse after resuming stimulation. The dots represent the  
104 mean  $\pm$  s.e.m. of 6 different cells in each condition. The insets show the corresponding current traces  
105 at the 1<sup>st</sup> and 15<sup>th</sup> voltage-clamp pulse for both control (black dots) and in the presence of HSP  $100$   
106  $\mu\text{mol}\cdot\text{L}^{-1}$ ; for clarity, only the first 15 ms of the current traces are shown. The 3-ms scale bar shown in  
107 panel A is scalable to all current traces in all panels.

108

109

110

111

112

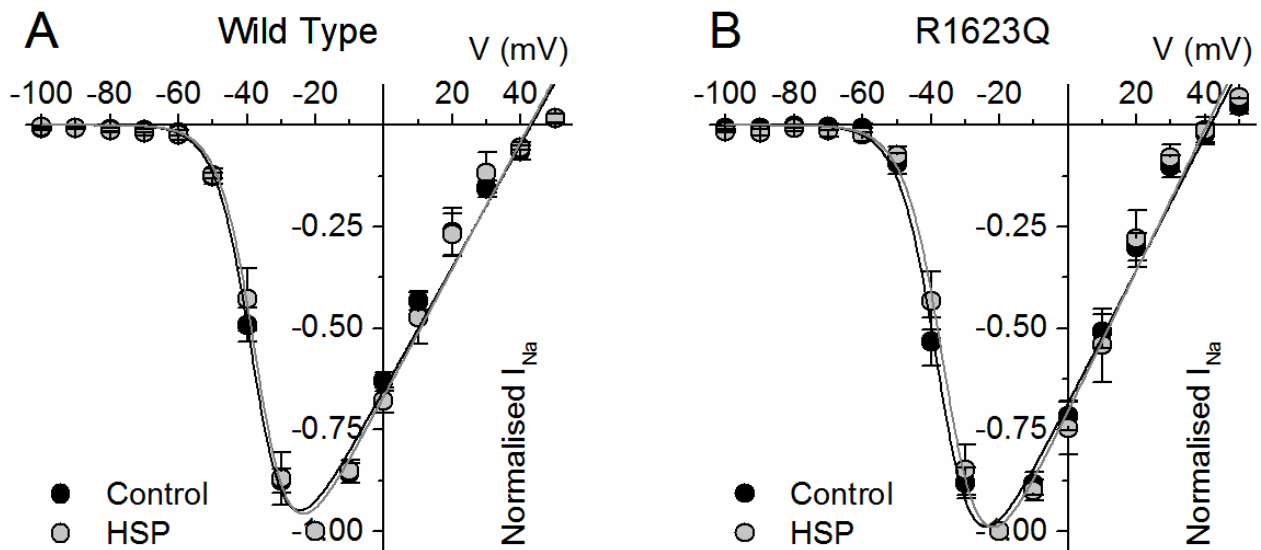

113

114 **Figure S5. – HSP does not affect the voltage-dependence of channel activation.**

115 Normalised current-to-voltage relationships of  $I_{Na}$  in WT (A) and R1623Q (B) under control condition

116 (black) and in the presence of HSP  $100 \mu\text{mol}\cdot\text{L}^{-1}$  (grey). The dots represent the mean  $\pm$  s.e.m. ( $n =$

117 13). The similar shape in both curves suggests that HSP does not affect the voltage-dependence of

118 channel activation.



119 **Table 1: Summary table comparing the inhibition potency of hesperetin on the different**  
 120 **experimental models studied.**

| <b>Experimental model</b>               | <b>IC<sub>50</sub> (μmol·L<sup>-1</sup>)</b> | <b>Hill number</b> | <b>Inhibition at maximal concentration tested (%)</b> |
|-----------------------------------------|----------------------------------------------|--------------------|-------------------------------------------------------|
| Aortic rings<br>(pre-contracted by KCl) | 21 ± 11                                      | 0.8 ± 0.2          | 78 ± 13                                               |
| Aortic rings<br>(pre-contracted by PE)  | 26 ± 16                                      | 0.8 ± 0.4          | 45 ± 9                                                |
| Cardiomyocytes I <sub>Na</sub>          | 100 ± 14                                     | 0.9 ± 0.1          | 95 ± 3                                                |
| hNav1.5 WT I <sub>Na</sub> -Peak        | 130 ± 10                                     | 0.8 ± 0.1          | 87 ± 1                                                |
| hNav1.5 WT I <sub>Na</sub> -10ms        | 54 ± 9                                       | 0.6 ± 0.1          | 89 ± 3                                                |
| hNav1.5 WT I <sub>Na</sub> -50ms        | 49 ± 5                                       | 0.5 ± 0.1          | 85 ± 1                                                |
| hNav1.5 WT I <sub>Na</sub> -500ms       | 56 ± 9                                       | 0.6 ± 0.1          | 86 ± 2                                                |
| hNav1.5 R1623Q I <sub>Na</sub> -Peak    | 136 ± 17                                     | 0.8 ± 0.1          | 90 ± 3                                                |
| hNav1.5 R1623Q I <sub>Na</sub> -10ms    | 35 ± 4                                       | 0.6 ± 0.1          | 95 ± 2                                                |
| hNav1.5 R1623Q I <sub>Na</sub> -50ms    | 31 ± 4                                       | 0.5 ± 0.1          | 88 ± 1                                                |
| hNav1.5 R1623Q I <sub>Na</sub> -500ms   | 32 ± 4                                       | 0.6 ± 0.1          | 93 ± 1                                                |
| hNav1.5 F1760A I <sub>Na</sub> -Peak    | N. D.                                        | N. D.              | 19 ± 2                                                |

121 (N. D.) Not determined. The accuracy of this IC<sub>50</sub> estimation is compromised due to the very small  
 122 maximal inhibition.

123

124

125

126 **Table 2: Summary table comparing the values of the parameters obtained from the modified**  
 127 **Boltzmann fit of the I-V relationships on the different experimental models studied.**

| Experimental model                                             | V <sub>act</sub> (mV) | S <sub>act</sub> (mV) | V <sub>inac</sub> (mV) | S <sub>inac</sub> (mV) |
|----------------------------------------------------------------|-----------------------|-----------------------|------------------------|------------------------|
| Cardiomyocytes I <sub>Na</sub> (Control)                       | -37.1 ± 0.6           | 4.4 ± 0.5             | -71.1 ± 0.2            | 7.3 ± 0.2              |
| Cardiomyocytes I <sub>Na</sub> (HSP 100 μmol·L <sup>-1</sup> ) | -36.4 ± 0.5           | 4.9 ± 0.2             | -75.1 ± 0.1*           | 6.9 ± 0.2              |
| hNav1.5 WT I <sub>Na</sub> (Control)                           | -34.7 ± 0.4           | 4.6 ± 0.3             | -74.8 ± 0.3            | 6.9 ± 0.3              |
| hNav1.5 WT I <sub>Na</sub> (HSP 100 μmol·L <sup>-1</sup> )     | -34.6 ± 0.4           | 4.3 ± 0.3             | -80.6 ± 0.4*           | 6.4 ± 0.4              |
| hNav1.5 R1623Q I <sub>Na</sub> (Control)                       | -33.9 ± 0.2           | 5.5 ± 0.2             | -75.4 ± 0.5            | 7.5 ± 0.4              |
| hNav1.5 R1623Q I <sub>Na</sub> (HSP 100 μmol·L <sup>-1</sup> ) | -33.5 ± 0.3           | 5.6 ± 0.2             | -87.4 ± 0.8*           | 5.6 ± 0.7              |
| hNav1.5 F1760A I <sub>Na</sub> (Control)                       | -34.3 ± 0.6           | 6.4 ± 0.4             | -73.2 ± 0.3            | 6.5 ± 0.3              |
| hNav1.5 F1760A I <sub>Na</sub> (HSP 1 mmol·L <sup>-1</sup> )   | -35.2 ± 0.4           | 6.6 ± 0.3             | -74.7 ± 0.4            | 6.8 ± 0.3              |

128 \* P < 0.05 with respect to control condition; paired t-test.

129

130

131 **Table 3: Summary table comparing the effects of hesperetin on the I<sub>Na</sub> activation and availability**  
 132 **curves on the different experimental models studied.**

| Experimental model                                             | V <sub>act</sub> (mV) | s (mV)     | G <sub>max</sub> (nS·pF <sup>-1</sup> ) | V <sub>Na</sub> (mV) |
|----------------------------------------------------------------|-----------------------|------------|-----------------------------------------|----------------------|
| Cardiomyocytes I <sub>Na</sub> (Control)                       | -39.5 ± 0.5           | -5.8 ± 0.6 | 1.2 ± 0.2                               | -2.2 ± 0.3           |
| Cardiomyocytes I <sub>Na</sub> (HSP 100 μmol·L <sup>-1</sup> ) | -38.0 ± 0.2           | -5.2 ± 0.5 | 0.8 ± 0.1*                              | -2.9 ± 0.5           |
| hNav1.5 WT I <sub>Na</sub> (Control)                           | -36.7 ± 1.2           | -4.5 ± 0.3 | 1.3 ± 0.1                               | 42.0 ± 0.6           |
| hNav1.5 WT I <sub>Na</sub> (HSP 100 μmol·L <sup>-1</sup> )     | -33.2 ± 3.3           | -4.7 ± 0.7 | 0.8 ± 0.1*                              | 41.3 ± 0.7           |
| hNav1.5 R1623Q I <sub>Na</sub> (Control)                       | -36.4 ± 1.3           | -4.8 ± 0.3 | 1.5 ± 0.2                               | 40.9 ± 1.3           |
| hNav1.5 R1623Q I <sub>Na</sub> (HSP 100 μmol·L <sup>-1</sup> ) | -32.4 ± 2.4           | -5.4 ± 0.6 | 1.0 ± 0.1*                              | 38.4 ± 1.7           |
| hNav1.5 F1760A I <sub>Na</sub> (Control)                       | -41.0 ± 1.3           | -5.1 ± 0.4 | 1.8 ± 0.2                               | 42.7 ± 1.1           |
| hNav1.5 F1760A I <sub>Na</sub> (HSP 1 mmol·L <sup>-1</sup> )   | -39.2 ± 0.7           | -4.6 ± 0.4 | 1.8 ± 0.1                               | 42.2 ± 1.2           |

133 \* P < 0.05 with respect to control condition; paired t-test.

134

135

136 **Table 4: Summary table comparing the effects of hesperetin on the time course of the inactivation**  
 137 **phase of the  $I_{Na}$  traces evoked at -40 mV (cardiomyocytes) or -20 mV (hNav1.5).**

| <b>Experimental model</b>                                            | <b><math>\tau_{fast}</math> (ms)</b> | <b><math>\tau_{slow}</math> (ms)</b> | <b>Relative <math>A_{slow}</math> (%)</b> |
|----------------------------------------------------------------------|--------------------------------------|--------------------------------------|-------------------------------------------|
| Cardiomyocytes $I_{Na}$ (Control)                                    | 1.30 ± 0.06                          | 9.3 ± 0.3                            | 2.6 ± 0.1                                 |
| Cardiomyocytes $I_{Na}$ (HSP 100 $\mu\text{mol}\cdot\text{L}^{-1}$ ) | 1.27 ± 0.06                          | 8.9 ± 0.3*                           | 2.0 ± 0.1*                                |
| hNav1.5 WT $I_{Na}$ (Control)                                        | 0.46 ± 0.02                          | 3.6 ± 0.1                            | 3.2 ± 0.1                                 |
| hNav1.5 WT $I_{Na}$ (HSP 100 $\mu\text{mol}\cdot\text{L}^{-1}$ )     | 0.41 ± 0.04                          | 2.8 ± 0.1*                           | 2.2 ± 0.1*                                |
| hNav1.5 R1623Q $I_{Na}$ (Control)                                    | 2.9 ± 0.1                            | 10.2 ± 0.4                           | 7.2 ± 0.4                                 |
| hNav1.5 R1623Q $I_{Na}$ (HSP 100 $\mu\text{mol}\cdot\text{L}^{-1}$ ) | 1.4 ± 0.2*                           | 5.3 ± 0.3*                           | 1.9 ± 0.1*                                |
| hNav1.5 F1760A $I_{Na}$ (Control)                                    | 0.78 ± 0.02                          | 7.9 ± 0.1                            | 1.3 ± 0.1                                 |
| hNav1.5 F1760A $I_{Na}$ (HSP 1 $\text{mmol}\cdot\text{L}^{-1}$ )     | 0.78 ± 0.01                          | 8.2 ± 0.4                            | 1.4 ± 0.1                                 |

138 \*  $P < 0.05$  with respect to control condition; paired t-test.

139

140
